# Supplementary material for: Longitudinal Randomized Cohort Study of SARS-CoV-2 Antibody Seroprevalence in the St. Petersburg Population
Source: MDPI journal article supplement (doi:10.3390/v14050913), 2022-04-27
Supplement: s1 [file s1]

**Table S1.** Dynamics of incidence and vaccination of the population of St. Petersburg in 2021.

| Week number 2021 | Number of infected ‰‰‰ | Number of people vaccinated ‰ |
|------------------|------------------------|-------------------------------|
| 1                | 208.49                 | 0                             |
| 2                | 421.31                 | 0                             |
| 3                | 398.23                 | 0                             |
| 4                | 410.75                 | 0                             |
| 5                | 269.73                 | 0.23                          |
| 6                | 198.71                 | 0.41                          |
| 7                | 153.93                 | 0.65                          |
| 8                | 140.17                 | 1.16                          |
| 9                | 121.22                 | 1.88                          |
| 10               | 125.44                 | 2.81                          |
| 11               | 123.58                 | 3.73                          |
| 12               | 118.77                 | 4.39                          |
| 13               | 102.52                 | 5.05                          |
| 14               | 92.43                  | 5.5                           |
| 15               | 91.1                   | 5.88                          |
| 16               | 91.71                  | 6.43                          |
| 17               | 89.85                  | 7.27                          |
| 18               | 93.55                  | 8.15                          |
| 19               | 93.16                  | 8.88                          |
| 20               | 96.04                  | 9.63                          |
| 21               | 104.01                 | 10.26                         |
| 22               | 109.3                  | 10.65                         |
| 23               | 108.83                 | 10.78                         |
| 24               | 111.49                 | 11.55                         |
| 25               | 123.04                 | 12.16                         |
| 26               | 150.16                 | 12.87                         |
| 27               | 204.52                 | 13.45                         |
| 28               | 250.28                 | 14.12                         |
| 29               | 254.57                 | 15.07                         |
| 30               | 251.93                 | 16.61                         |
| 31               | 249.56                 | 18.58                         |
| 32               | 248.15                 | 20.53                         |

---

|    |        |       |
|----|--------|-------|
| 33 | 234.23 | 23.06 |
| 34 | 196.4  | 24.93 |
| 35 | 150.36 | 26.34 |
| 36 | 148.43 | 27.65 |
| 37 | 164.48 | 28.8  |
| 38 | 190.72 | 29.77 |
| 39 | 208.98 | 30.63 |
| 40 | 265.68 | 31.48 |
| 41 | 310.85 | 32.27 |
| 42 | 351.89 | 33.16 |
| 43 | 422.73 | 34.33 |
| 44 | 411.45 | 35.32 |
| 45 | 406.88 | 36.01 |
| 46 | 395.35 | 37.42 |
| 47 | 360.01 | 39.01 |
| 48 | 220.18 | 40.85 |
| 49 | 313.56 | 42.93 |
| 50 | 286.7  | 45.27 |
| 51 | 222.59 | 47.05 |

**Table S2.** Distribution of proportions of seropositivity to N and RBD ags in children and adult volunteers of the surveyed age groups at the stages of seromonitoring.

| Age.<br>years | Stages of the seromonitoring |                      |                      |                       |                      |                       |                      |                       |                      |                       |
|---------------|------------------------------|----------------------|----------------------|-----------------------|----------------------|-----------------------|----------------------|-----------------------|----------------------|-----------------------|
|               | 1                            |                      | 2                    |                       | 3                    |                       | 4                    |                       | 5                    |                       |
|               | Nc ab. %<br>(95% CI)         | RBD ab.%<br>(95% CI) | Nc ab. %<br>(95% CI) | RBD ab. %<br>(95% CI) | Nc ab. %<br>(95% CI) | RBD ab. %<br>(95% CI) | Nc ab. %<br>(95% CI) | RBD ab. %<br>(95% CI) | Nc ab. %<br>(95% CI) | RBD ab. %<br>(95% CI) |
| 1-17          | 37.0<br>(30.6-43.8)          | 22.7<br>(16.1-30.5)  | 47.2<br>(39.7-54.8)  | 26.2<br>(19.2-34.3)   | 54.6<br>(47.7-61.4)  | 51.8<br>(43.2-60.3)   | 46.5<br>(39.1-54.0)  | 70.0<br>(61.7-77.4)   | 30.9<br>(23.8-38.6)  | 74.7<br>(67.3-81.2)   |
| 18-29         | 24.1<br>(18.8-30)            | 16.7<br>(11.1-23.6)  | 29.2<br>(22.9-36.0)  | 18.0<br>(12.2-25.1)   | 38.4<br>(32.3-44.9)  | 32.0<br>(24.6-40.1)   | 38.6<br>(31.8-45.8)  | 60.0<br>(51.7-67.9)   | 37.9<br>(30.5-45.6)  | 83.4<br>(76.9-88.7)   |
| 30-39         | 27.5<br>(22.5-32.9)          | 16.6<br>(11.7-22.5)  | 25.0<br>(19.6-31.0)  | 19.4<br>(14.2-25.6)   | 34.8<br>(29.4-40.4)  | 30.3<br>(24.0-37.2)   | 45.6<br>(39.4-51.8)  | 57.8<br>(50.6-64.7)   | 36.0<br>(26.9-42.4)  | 77.0<br>(71.1-82.2)   |
| 40-49         | 23.6<br>(18.8-29)            | 17.2<br>(12.2-23.0)  | 24.3<br>(19.1-30.1)  | 20.6<br>(15.3-26.8)   | 34.0<br>(28.5-39.8)  | 37.7<br>(31.1-44.8)   | 41.9<br>(36.0-48.1)  | 60.8<br>(53.7-67.5)   | 42.2<br>(36.1-48.6)  | 80.5<br>(75-85.2)     |
| 50-59         | 30.2<br>(25.1-35.8)          | 22.5<br>(17.2-28.5)  | 27.9<br>(22.5-33.7)  | 24.7<br>(19.2-30.8)   | 40.2<br>(34.6-46.0)  | 34.8<br>(28.6-41.4)   | 43.3<br>(37.6-49.2)  | 57.1<br>(50.4-63.6)   | 39.4<br>(33.4-45.6)  | 81.5<br>(76.2-86.0)   |
| 60-69         | 33.0<br>(27.8-39.8)          | 22.1<br>(16.9-28.1)  | 29.3<br>(23.9-35.3)  | 24.8<br>(19.2-30.9)   | 40.7<br>(35.1-46.5)  | 34.5<br>(28.3-41.1)   | 46.7<br>(41.0-52.5)  | 63.3<br>(56.6-69.6)   | 54.1<br>(47.9-60.2)  | 82.5<br>(77.4-86.8)   |
| 70+           | 37.1<br>(29.1-45.5)          | 21.8<br>(14.2-31.3)  | 23.2<br>(16.1-31.6)  | 22.8<br>(15-32.2)     | 32.9<br>(25.2-41.2)  | 34.6<br>(25.5-44.8)   | 50.4<br>(41.6-59.1)  | 61.4<br>(51.2-70.9)   | 52.0<br>(42.8-61.1)  | 76.4<br>(67.9-83.6)   |
| Overall<br>l  | 29.7<br>(24.6-31.9)          | 20.1<br>(17.9-22.4)  | 29.1<br>(26.6-31.5)  | 22.4<br>(20.1-24.8)   | 39.3<br>(34.7-41.6)  | 36.1<br>(33.4-38.8)   | 44.5<br>(42.0-46.9)  | 61.0<br>(58.3-63.8)   | 41.9<br>(39.4-44.5)  | 79.9<br>(77.7-1.9)    |

Table S3: Distribution of Abs to RBD ag levels among children and adults in the dynamics of seromonitoring.

| Ages<br>interval.<br>years | Proportion of individuals with different levels of abs at different stages. % (95% CI) |                   |                    |                                   |                   |                   |                                   |                   |                    |                                       |                    |                     |                                   |                    |                     |
|----------------------------|----------------------------------------------------------------------------------------|-------------------|--------------------|-----------------------------------|-------------------|-------------------|-----------------------------------|-------------------|--------------------|---------------------------------------|--------------------|---------------------|-----------------------------------|--------------------|---------------------|
|                            | 1 stage; antibodies level. BAU/ml                                                      |                   |                    | 2 srage; antibodies level. BAU/ml |                   |                   | 3 stage; antibodies level. BAU/ml |                   |                    | 4 stage; antibodies abs level. BAU/ml |                    |                     | 5 stage; antibodies level. BAU/ml |                    |                     |
|                            | 22.6-220                                                                               | 221-450           | >450               | 22.6-220                          | 221-450           | >450              | 22.6-220                          | 221-450           | >450               | 22.6-220                              | 221-450            | >450                | 22.6-220                          | 221-450            | >450                |
| 1-17                       | 5.7<br>(2.5-10.9)                                                                      | 5.7<br>(2.5-10.9) | 13.5<br>(8.3-17.2) | 14.9<br>(9.5-21.9)                | 9.9<br>(5.5-16.1) | 1.4<br>(0.2-5.0)  | 30.5<br>(23-38.8)                 | 9.2<br>(5-15.2)   | 12.1<br>(7.2-18.6) | 47.9<br>(39.4-56.5)                   | 12.9<br>(7.8-19.6) | 9.3<br>(5-15.4)     | 55.0<br>(45.2-64.4)               | 5.4<br>(2-11.4)    | 9.0<br>(4.4-15.9)   |
| 18-29                      | 10.7<br>(6.2-16.7)                                                                     | 2.7<br>(0.7-6.7)  | 3.3<br>(1.1-7.6)   | 13.3<br>(8.3-19.8)                | 2.3<br>(0.7-7.0)  | 2.0<br>(0.4-5.7)  | 22<br>(15.6-29.5)                 | 6.0<br>(2.8-11.1) | 4.0<br>(1.5-8.5)   | 42.0<br>(34-50.3)                     | 10.0<br>(5.7-15.9) | 8.1<br>( 4.2-13.6)  | 44.2<br>(34.9-53.9)               | 15.9<br>(9.7-24)   | 24.8<br>(17.1-33.8) |
| 30-39                      | 9.5<br>(5.8-14.5)                                                                      | 3.5<br>(1.4-7.1)  | 3.5<br>(1.4-7.1)   | 14.4<br>(9.6-20.1)                | 2.0<br>(0.5-5.0)  | 3.0<br>(1.1-6.4)  | 21.7<br>(16.2-28.1)               | 5.1<br>(2.1-9.1)  | 3.5<br>(1.4-7.1)   | 43.7<br>(36.7-50.9)                   | 7.5<br>(4.3-12.1)  | 6.5<br>(3.5-10.9)   | 42<br>(34.2-50.2)                 | 9.6<br>(5.4-15.3)  | 25.5<br>(18.9-33.0) |
| 40-49                      | 4.9<br>(2.4-8.8)                                                                       | 4.9<br>(2.4-8.8)  | 7.4<br>(4.2-11.8)  | 9.8<br>(6.1-14.7)                 | 6.4<br>(3.4-10.6) | 4.4<br>(2.0-8.2)  | 26<br>(20.1-32.6)                 | 5.4<br>(2.7-9.4)  | 6.4<br>(3.4-10.6)  | 34.8<br>(28.3-41.8)                   | 11.8<br>(7.7-17)   | 14.2<br>(9.7-19.8)  | 30.2<br>(23.5-37.7)               | 11.6<br>(7.2-17.4) | 36.6<br>(29.4-44.0) |
| 50-59                      | 8.8<br>(5.5-13.3)                                                                      | 4.4<br>(1.1-8.0)  | 9.2<br>(5.8-13.8)  | 15.0<br>(10.6-20.3)               | 4.8<br>(2.4-8.5)  | 4.8<br>(2.4-8.5)  | 22.9<br>(17.6-28.9)               | 6.6<br>(3.8-10.7) | 5.3<br>(2.7-9.1)   | 33.6<br>(27.5-40.2)                   | 10.6<br>(6.9-15.4) | 12.8<br>(8.8-17.9)  | 39.9<br>(32.7-47.4)               | 12<br>(7.7-17.6)   | 29.5<br>(23-36.7)   |
| 60-69                      | 6.2<br>(3.4-10.2)                                                                      | 3.1<br>(1.2-6.3)  | 12.8<br>(8.8-17.9) | 12.4<br>(8.4-17.4)                | 2.7<br>(1.0-5.7)  | 9.7<br>(6.2-14.4) | 15.9<br>(11.4-21.4)               | 8.0<br>(4.8-12.3) | 10.6<br>(6.9-15.4) | 31.0<br>(25-37.4)                     | 12.4<br>(8.4-17.4) | 19.9<br>(14.9-25.7) | 32.6<br>(26-39.8)                 | 11.8<br>(7.5-17.3) | 34.8<br>(28-42.1)   |
| 70+                        | 5.0<br>(1.6-11.1)                                                                      | 3.0<br>(0.6-8.4)  | 13.9<br>(7.8-22.2) | 9.9<br>(4.8-17.5)                 | 4.0<br>(1.1-9.8)  | 8.9<br>(4.2-16.2) | 14.9<br>(8.6-23.3)                | 9.9<br>(4.8-17.5) | 9.9<br>(4.8-17.5)  | 28.7<br>(20.1-38.6)                   | 10.9<br>(5.6-18.6) | 21.7<br>(14.2-31.3) | 35.1<br>(24.5-46.8)               | 13.0<br>(6.4-22.6) | 26.0<br>(16.6-37.2) |
| Overall                    | 7.4<br>(6.0-9.0)                                                                       | 3.9<br>(2.8-5.0)  | 8.8<br>(7.3-10.5)  | 13<br>(11.1-15)                   | 4.5<br>(3.4-5.8)  | 5.0<br>(3.8-6.3)  | 22.1<br>(19.8-24.5)               | 6.9<br>(5.5-8.4)  | 7.1<br>(5.8-8.7)   | 37.2<br>(34.5-39.9)                   | 10.8<br>(9.2-12.7) | 13.1<br>(11.3-15.1) | 39.0<br>(36-42.1)                 | 11.3<br>(9.4-13.4) | 28.0<br>(25.2-30.9) |

Table S4: The proportion of asymptomatic forms of COVID-19 among seropositive volunteers at the stages of seromonitoring

| Ages<br>intervals<br>years | Stages of seromonitoring |                 |                 |                 |                  |
|----------------------------|--------------------------|-----------------|-----------------|-----------------|------------------|
|                            | 1.<br>%(95% CI)          | 2.<br>%(95% CI) | 3.<br>%(95% CI) | 4.<br>%(95% CI) | 5.<br>%(95% CI)  |
| 1-17                       | 88.4(81.3-93.5)          | 93.1(86.2-97.2) | 93.2(87.1-97.0) | 91.9(83.9-97.0) | 80(66.3-90.0)    |
| 18-29                      | 85.5(76.1-92.3)          | 89.0(79.5-95.2) | 84.9(76.0-91.5) | 86.8(77.1-93.5) | 59.4(46.3-71.5)# |
| 30-39                      | 92.6(85.4-97)            | 90.6(80.7-96.5) | 84.8(76.4-91.0) | 85.7(78.1-91.4) | 63.9(52.9-74.0)# |
| 40-49                      | 89.8(81.5-95.2)          | 90.9(81.3-96.6) | 88.8(80.8-94.3) | 87.5(80.0-93.0) | 71.7(62.1-80.0)  |
| 50-59                      | 81.9(73.2-88.7)          | 82.5(72.4-90.1) | 89.3(82.3-94.1) | 82.0(74.1-88.1) | 69.6(59.7-78.3)# |
| 60-69                      | 84.4(76.9-90.2)          | 86.1(76.9-92.6) | 86.1(78.6-91.7) | 82.4(75.1-88.3) | 71(62.9-78.3)    |
| 70+                        | 82.4(72.6-90.0)          | 82.3(65.5-93.2) | 80.8(66.7-90.8) | 77.9(66.2-87.1) | 70.3(57.6-81.1)  |
| Overall.<br>Me [IQR]       | 86.4(83.6-88.8)          | 88.3(85.2-91.0) | 87.5(84.8-90.0) | 84.8(82.0-87.3) | 69.8(66.1-73.4)* |

Note: \* Differences are statistically significant compared to the final data at other stages of monitoring.  
# Differences are statistically significant compared to data's at other stages monitoring of same ages interval.  
Overall expressed as Me[IQR].  
IQR - interquartile range.
